# Supplementary material for: The Lipid-Modifying Multiple Peptide Resistance Factor Is an Oligomer Consisting of Distinct Interacting Synthase and Flippase Subunits
Source: PubMed Central journal article supplement — mBio. 2015 Jan 27;6(1):e02340-14. doi: 10.1128/mBio.02340-14 (PMC4324311; doi:10.1128/mbio.02340-14), 2015-01-27
Supplement: mbo004142134sf2.pdf [file mbo004142134sf2.pdf]

| Interaction partners |            | Interactions [Miller Units] |               |               |               |      |
|----------------------|------------|-----------------------------|---------------|---------------|---------------|------|
| A                    | B          | pKT25C-A                    | pKT25C-A      | pUT18C-A      | pUT18N-A      | max. |
|                      |            | +<br>pUT18C-B               | +<br>pUT18N-B | +<br>pKT25C-B | +<br>pKT25C-B |      |
| Flip +2              | Flip +2    | 156                         | 104           | -             | -             | 156  |
|                      | Flip       | 169                         | 192           | 245           | 226           | 245  |
|                      | Syn-h +2   | 58                          | 50            | 56            | 60            | 60   |
|                      | Syn-h      | 56                          | 60            | 108           | 62            | 108  |
|                      | Syn-cyt    | 66                          | 63            | 54            | 222           | 222  |
|                      | Syn-h-cyt  | 498                         | 507           | 213           | 433           | 507  |
|                      | MprF       | 213                         | 179           | 148           | 331           | 331  |
| Flip                 | Flip       | 302                         | 165           | -             | -             | 302  |
|                      | Syn-h +2   | 54                          | 53            | 69            | 64            | 69   |
|                      | Syn-h      | 325                         | 279           | 608           | 204           | 608  |
|                      | Syn-cyt    | 65                          | 61            | 66            | 550           | 550  |
|                      | Syn-h-cyt  | 1165                        | 170           | 906           | 593           | 1165 |
|                      | MprF       | 252                         | 447           | 384           | 828           | 828  |
| Syn-h +2             | Syn-h +2   | 53                          | 50            | -             | -             | 53   |
|                      | Syn-h      | 57                          | 46            | 51            | 50            | 57   |
|                      | Syn-cyt    | 62                          | 64            | 49            | 51            | 64   |
|                      | Syn-h-cyt  | 69                          | 62            | 50            | 47            | 69   |
|                      | MprF       | 69                          | 69            | 61            | 52            | 69   |
| Syn-h                | Syn-h      | 61                          | 61            | -             | -             | 61   |
|                      | Syn-cyt    | 65                          | 65            | 60            | 93            | 93   |
|                      | Syn--h-cyt | 93                          | 72            | 47            | 60            | 93   |
|                      | MprF       | 72                          | 72            | 80            | 62            | 80   |
| Syn-cyt              | Syn-cyt    | 66                          | 1425          | -             | -             | 1425 |
|                      | Syn-h-cyt  | 64                          | 299           | 63            | 72            | 299  |
|                      | MprF       | 71                          | 68            | 77            | 61            | 77   |
| Syn-h-cyt            | Syn-h-cyt  | 101                         | 570           | -             | -             | 570  |
|                      | MprF       | 82                          | 463           | 276           | 595           | 595  |
| MprF                 | MprF       | 382                         | 490           | -             | -             | 490  |

**Miller Units**

0-150

150-500

500-1000

1000-1500



Supplemental Figure 2:  $\beta$ -galactosidase activity in Miller Units of *E. coli* expressing MprF domain interaction partners (A and B) fused N- or C-terminally to adenylate cyclase fragments. C-terminal fusions encoded by low-copy number plasmid pKT25C and high-copy number plasmid pUT18C. N-terminal fusions encoded by high-copy number plasmid pUT18N. The mean of at least 3 independent experiments is shown.
